# Supplementary material
Source: PubMed Central journal article supplement (PMC1459317)

Figure S1, Pandey S. et al.

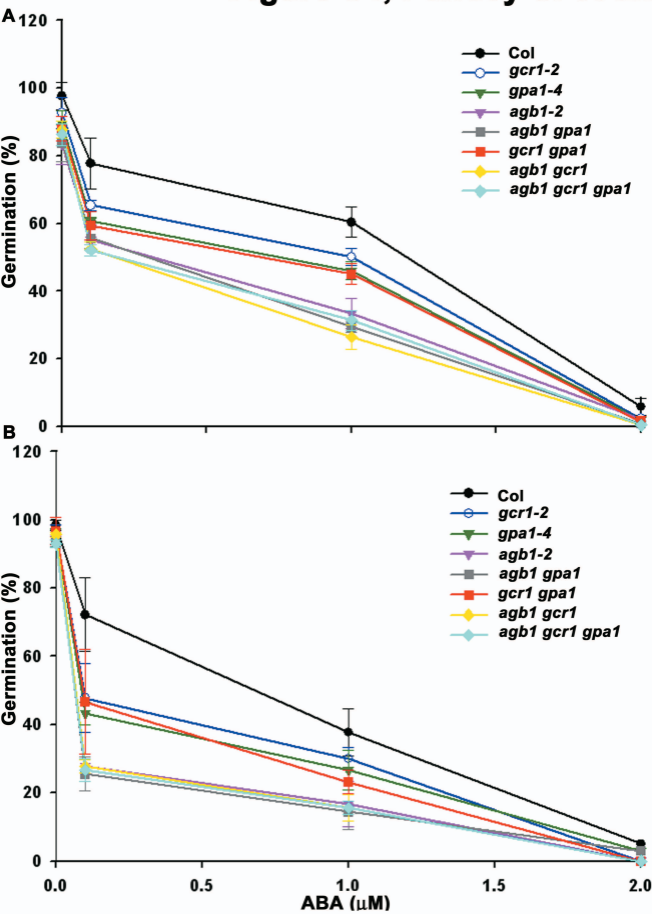

Supplement: plntphys_pp.106.079038_1.pdf [file plntphys_pp.106.079038_1.pdf]

Figure S2, Pandey S. et al.

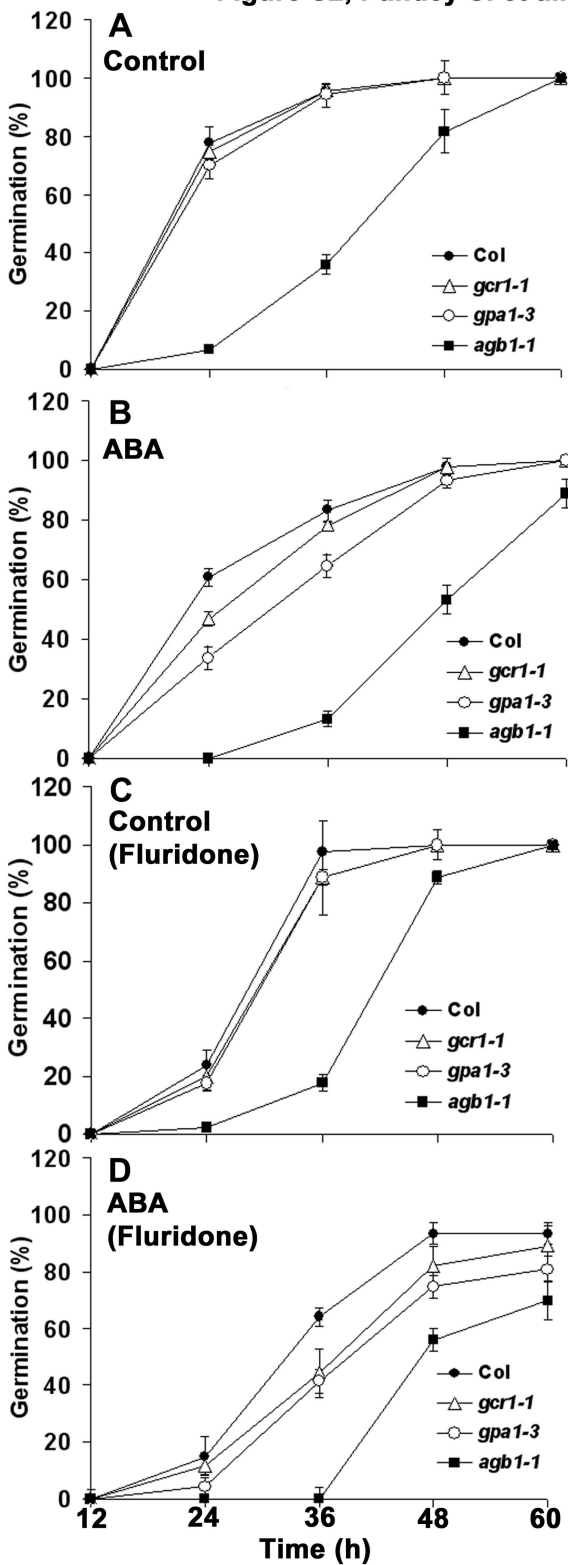

Supplement: plntphys_pp.106.079038_2.pdf [file plntphys_pp.106.079038_2.pdf]

Figure S3, Pandey et al.

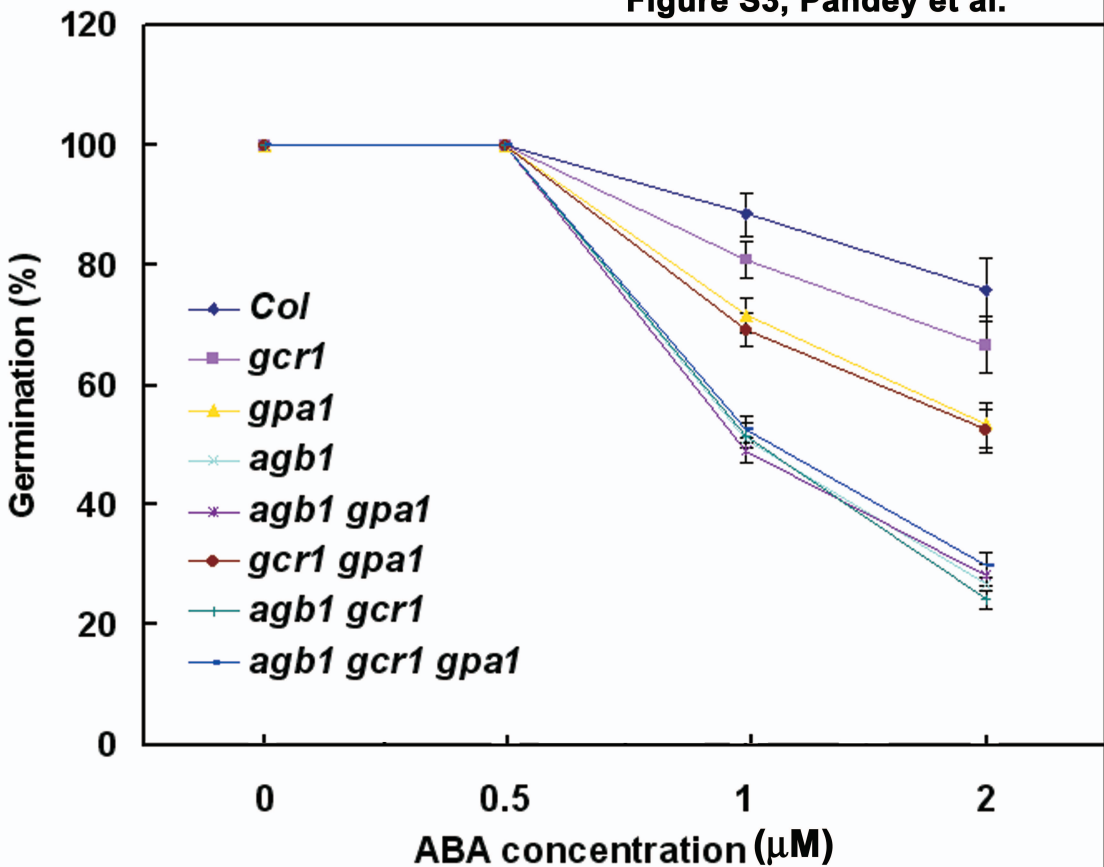

Supplement: plntphys_pp.106.079038_3.pdf [file plntphys_pp.106.079038_3.pdf]

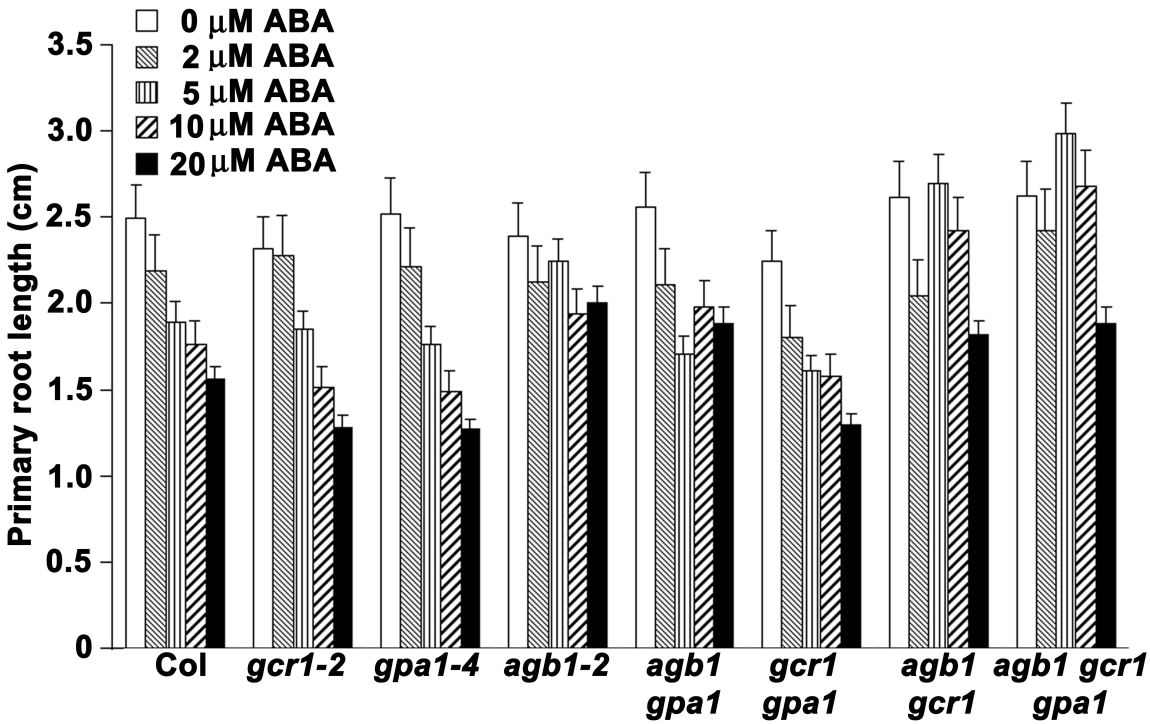

Supplement: plntphys_pp.106.079038_4.pdf [file plntphys_pp.106.079038_4.pdf]
